## Erratum: Clinical role and biological function of CDK5 in hepatocellular carcinoma: A study based on immunohistochemistry, RNA-seq and *in vitro* investigation

Rui Zhang<sup>1,\*</sup>, Peng Lin<sup>2,\*</sup>, Hong Yang<sup>2</sup>, Yun He<sup>2</sup>, Yi-Wu Dang<sup>1</sup>, Zhen-Bo Feng<sup>1</sup> and Gang Chen<sup>1</sup>

<sup>1</sup>Department of Pathology, First Affiliated Hospital of Guangxi Medical University, Nanning, Guangxi Zhuang Autonomous Region, P. R. China

<sup>2</sup>Department of Ultrasonography, First Affiliated Hospital of Guangxi Medical University, Nanning, Guangxi Zhuang Autonomous Region, P. R. China

\*These authors have contributed equally to this work

### Published:

**Copyright:** Zhanget al. This is an open-access article distributed under the terms of the Creative Commons Attribution License 3.0 (CC BY 3.0), which permits unrestricted use, distribution, and reproduction in any medium, provided the original author and source are credited.

Original article: Oncotarget. 2017; 8:108333–108354. <https://doi.org/10.18632/oncotarget.22659>

**This article has been corrected:** In the original paper by Rui Zhang, et al., entitled “Clinical role and biological function of CDK5 in hepatocellular carcinoma: A study based on immunohistochemistry, RNA-seq and *in vitro* investigation”, there are multiple errors in the texts as well as the whole of Figure 15. The corrections are as follows:

- Line 10 of the **ABSTRACT** section, page 108333: “in the HCC cell lines HepG2 and **HepB3**” should be corrected into “in the HCC cell lines HepG2 and **Hep3B**”.
- Legends of Figure 8, page 108344, the comma in “When SMD > 0 and its 95% CI do not cross, 0 indicates increased CDK5 expression in HCC compared with noncancerous samples” should be deleted: “When SMD > 0 and its 95% CI do not cross 0 indicates increased CDK5 expression in HCC compared with noncancerous samples”.
- Section of the **RESULTS**, left side of page 108345, ① line 2 of **Bioinformatic analysis suggests that CDK5 is associated with the proliferative signaling pathway**, “**differently** expressed genes” should be corrected into “**differentially** expressed genes”. ② Right side of page 108345, line 12 of **CDK5-siRNA inhibited cell growth and induced apoptosis *in vitro***, “Figure 13**B**, Figure 14**C**” should be corrected into “Figure 13**B-C**, Figure 14**B-C**”. ③ Right side of page 108345, line 2, 8, 14, 16 and 26 of **CDK5-siRNA inhibited cell growth and induced apoptosis *in vitro***, please change “**HepB3**” into “**Hep3B**”.
- Title of Figure 13, page 108348, “Effects of CDK5-specific-siRNA on cell growth and apoptosis in HCC **HepB3** cells” should be corrected into “Effects of CDK5-specific-siRNA on cell growth and apoptosis in HCC **Hep3B** cells”.
- Right side of page 108350, line 3 of the **DISCUSSION** section: “indicating that CDK5 **down-regulation** induces the low apoptosis rates” should be corrected into “indicating that CDK5 **up-regulation** induces the low apoptosis rates”.
- Legends of Figure 15, page 108350, “**HepB3**” should be corrected into “**Hep3B**”.
- Section of the **MATERIALS AND METHODS**, left side of page 108351, line 15 of **Immunohistochemical technique**, “**permitting the use the samples**” should be corrected into “**permitting the use of the samples**”.
- Section of the **MATERIALS AND METHODS**, left side of page 108352, ① line 1 of **Experiment *in vitro***, ② line 4 of **Viability**, ③ and line 5 of **Evaluation of cell apoptosis and morphology using fluorescence microscopy**, please change “**HepB3**” into “**Hep3B**”.

Due to errors during preparation of the manuscript, the wrong image files were selected for all six panels of Figure 15. The correct Figure 15 is shown below. The authors declare that these corrections do not change the results or conclusions of this paper.

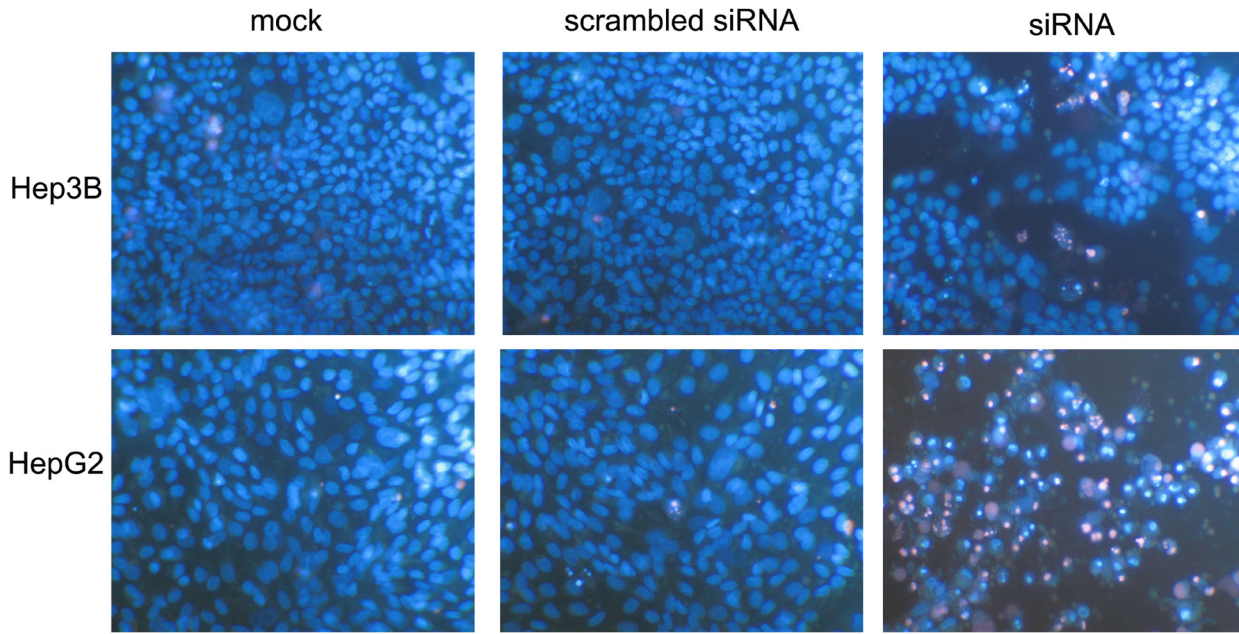

**Figure 15: Effects of CDK5-specific-siRNA detected by Hoechst33342 and PI double fluorescent staining.** Hep3B and HepG2 cell lines were treated with CDK5-specific-siRNA. Live cells and apoptotic cells were detected with Hoechst33342 and PI double fluorescent staining on the 10th day.
